# Supplementary material
Source: PubMed Central journal article supplement (PMC2532061)
Supplement: NIHMS61033-supplement-si20060309_095.pdf [file NIHMS61033-supplement-si20060309_095.pdf]

# Supporting Information

## Microbial Metabolism Studies of Cyanthiwigin B

Jiangnan Peng,<sup>†</sup> Noer Kasanah,<sup>†</sup> Charles E. Stanley,<sup>†</sup> Jennifer Chadwick,<sup>†</sup> Frank R  
Fronczek,<sup>‡</sup> and Mark T. Hamann<sup>†</sup>

<sup>†</sup>*Department of Pharmacognosy and National Center for Natural Products Research,  
School of Pharmacy, University of Mississippi, MS 38677, USA*

<sup>‡</sup>*Chemistry Department, Louisiana State University, Baton Rouge, Louisiana  
70803-1804*

X-ray analysis and crystal data for cyanthiwigin AE

**Table 3.** Fractional atomic coordinates and equivalent isotropic displacement parameters

**Table 4.** Anisotropic displacement parameters

**Table 5.** Selected geometric parameters

## X-ray analysis and crystal data for cyanthiwigin AE

### *Crystal data*

$C_{20}H_{28}O_3$

$M_r = 316.42$

Orthorhombic

$P2_12_12_1$

$a = 8.474 (3) \text{ \AA}$

$b = 10.392 (3) \text{ \AA}$

$c = 19.749 (8) \text{ \AA}$

$V = 1739.1 (11) \text{ \AA}^3$

$Z = 4$

$D_x = 1.208 \text{ Mg m}^{-3}$

$D_m$  not measured

Mo  $K\alpha$  radiation

$\lambda = 0.71073 \text{ \AA}$

Cell parameters from 2138 reflections

$\theta = 2.5\text{--}27.5^\circ$

$\mu = 0.079 \text{ mm}^{-1}$

$T = 102 \text{ K}$

Fragment

Colorless

$0.37 \times 0.15 \times 0.07 \text{ mm}$

Crystal source: local laboratory

### *Data collection*

KappaCCD (with Oxford Cryostream) diffractometer

$\omega$  scans with  $\kappa$  offsets

Absorption correction: none

3928 measured reflections

2266 independent reflections

1871 reflections with

$I > 2\sigma(I)$

$R_{\text{int}} = 0.042$

$\theta_{\text{max}} = 27.5^\circ$

$h = -10 \rightarrow 10$

$k = -13 \rightarrow 13$

$l = -25 \rightarrow 25$

intensity decay:  $<2\%$

### *Refinement*

Refinement on  $F^2$

$R[F^2 > 2\sigma(F^2)] = 0.042$

$wR(F^2) = 0.104$

$S = 1.055$

2266 reflections

217 parameters

H atoms treated by a mixture of independent and constrained refinement

$w = 1/[\sigma^2(F_o^2) + (0.0492P)^2 + 0.2874P]$

where  $P = (F_o^2 + 2F_c^2)/3$

$(\Delta/\sigma)_{\text{max}} = 0.000$

$\Delta\rho_{\text{max}} = 0.20 \text{ e \AA}^{-3}$

$\Delta\rho_{\text{min}} = -0.20 \text{ e \AA}^{-3}$

Extinction correction: *SHELXL*

Extinction coefficient: 0.013 (3)

Scattering factors from *International Tables for Crystallography* (Vol. C)

**Table 3.** Fractional atomic coordinates and equivalent isotropic displacement parameters ( $\text{\AA}^2$ )
$$U_{\text{eq}} = (1/3)\sum_i\sum_j U^{ij} a^i a^j \mathbf{a}_i \cdot \mathbf{a}_j.$$

|      | $x$          | $y$          | $z$          | $U_{\text{eq}}$ |
|------|--------------|--------------|--------------|-----------------|
| O1   | 0.5887 (2)   | 0.70968 (17) | 0.32502 (9)  | 0.0311 (4)      |
| O2   | 0.74155 (19) | 0.59592 (18) | 0.45590 (9)  | 0.0321 (4)      |
| O3   | 0.18334 (19) | 0.37630 (16) | 0.64812 (8)  | 0.0254 (4)      |
| C1   | 0.4835 (3)   | 0.6406 (2)   | 0.34565 (11) | 0.0227 (5)      |
| C2   | 0.3208 (3)   | 0.6357 (2)   | 0.32279 (12) | 0.0232 (5)      |
| H2   | 0.2787       | 0.6879       | 0.2877       | 0.028           |
| C3   | 0.2374 (3)   | 0.5479 (2)   | 0.35754 (11) | 0.0208 (5)      |
| C4   | 0.3352 (2)   | 0.4858 (2)   | 0.41379 (11) | 0.0195 (5)      |
| H4   | 0.3326       | 0.3907       | 0.4063       | 0.023           |
| C5   | 0.2617 (3)   | 0.5123 (2)   | 0.48550 (11) | 0.0193 (5)      |
| H5   | 0.2001       | 0.5942       | 0.4822       | 0.023           |
| C6   | 0.3886 (3)   | 0.5317 (2)   | 0.54108 (11) | 0.0208 (5)      |
| C7   | 0.5024 (3)   | 0.6373 (2)   | 0.51573 (12) | 0.0228 (5)      |
| H7A  | 0.4411       | 0.7136       | 0.5014       | 0.027           |
| H7B  | 0.5733       | 0.6636       | 0.5531       | 0.027           |
| C8   | 0.5988 (3)   | 0.5891 (2)   | 0.45749 (12) | 0.0237 (5)      |
| C9   | 0.5063 (3)   | 0.5322 (2)   | 0.39864 (12) | 0.0219 (5)      |
| C10  | 0.1441 (3)   | 0.4041 (2)   | 0.50107 (12) | 0.0225 (5)      |
| H10A | 0.0969       | 0.3751       | 0.4578       | 0.027           |
| H10B | 0.2035       | 0.3305       | 0.5201       | 0.027           |
| C11  | 0.0104 (3)   | 0.4370 (3)   | 0.54969 (12) | 0.0250 (5)      |
| H11A | -0.0390      | 0.5179       | 0.5339       | 0.030           |
| H11B | -0.0704      | 0.3685       | 0.5459       | 0.030           |
| C12  | 0.0501 (3)   | 0.4529 (2)   | 0.62356 (12) | 0.0245 (5)      |
| C13  | 0.1941 (3)   | 0.5161 (2)   | 0.64768 (12) | 0.0236 (5)      |
| H13  | 0.189 (3)    | 0.551 (3)    | 0.6940 (13)  | 0.028           |
| C14  | 0.3199 (3)   | 0.5845 (2)   | 0.60787 (12) | 0.0235 (5)      |
| H14A | 0.4103       | 0.5967       | 0.6390       | 0.028           |
| H14B | 0.2783       | 0.6714       | 0.5977       | 0.028           |
| C15  | -0.0921 (3)  | 0.4521 (3)   | 0.66953 (12) | 0.0334 (6)      |
| H15A | -0.1467      | 0.3693       | 0.6655       | 0.050           |
| H15B | -0.1640      | 0.5217       | 0.6564       | 0.050           |
| H15C | -0.0580      | 0.4648       | 0.7165       | 0.050           |
| C16  | 0.4835 (3)   | 0.4083 (2)   | 0.55485 (12) | 0.0246 (5)      |
| H16A | 0.5725       | 0.4281       | 0.5848       | 0.037           |
| H16B | 0.5233       | 0.3737       | 0.5120       | 0.037           |

**Table 3.** Fractional atomic coordinates and equivalent isotropic displacement parameters ( $\text{\AA}^2$ )  
(continued)

|      |             |            |              |            |
|------|-------------|------------|--------------|------------|
| H16C | 0.4152      | 0.3444     | 0.5766       | 0.037      |
| C17  | 0.6029 (3)  | 0.4254 (2) | 0.36386 (14) | 0.0298 (6) |
| H17A | 0.7037      | 0.4607     | 0.3483       | 0.045      |
| H17B | 0.5438      | 0.3918     | 0.3250       | 0.045      |
| H17C | 0.6226      | 0.3556     | 0.3962       | 0.045      |
| C18  | 0.0689 (3)  | 0.5112 (2) | 0.34233 (12) | 0.0223 (5) |
| H18  | 0.0074      | 0.5167     | 0.3854       | 0.027      |
| C19  | 0.0615 (3)  | 0.3716 (2) | 0.31698 (12) | 0.0265 (5) |
| H19A | 0.1189      | 0.3645     | 0.2741       | 0.040      |
| H19B | -0.0489     | 0.3468     | 0.3101       | 0.040      |
| H19C | 0.1098      | 0.3146     | 0.3506       | 0.040      |
| C20  | -0.0075 (3) | 0.6011 (3) | 0.29091 (12) | 0.0297 (6) |
| H20A | -0.0018     | 0.6899     | 0.3075       | 0.044      |
| H20B | -0.1182     | 0.5767     | 0.2846       | 0.044      |
| H20C | 0.0485      | 0.5946     | 0.2476       | 0.044      |

**Table 4.** Anisotropic displacement parameters ( $\text{\AA}^2$ )

|     | $U_{11}$    | $U_{22}$    | $U_{33}$    | $U_{12}$     | $U_{13}$     | $U_{23}$     |
|-----|-------------|-------------|-------------|--------------|--------------|--------------|
| O1  | 0.0334 (10) | 0.0289 (9)  | 0.0310 (10) | -0.0132 (9)  | -0.0026 (8)  | 0.0042 (8)   |
| O2  | 0.0180 (8)  | 0.0402 (10) | 0.0380 (10) | -0.0027 (8)  | -0.0025 (7)  | 0.0096 (9)   |
| O3  | 0.0285 (9)  | 0.0226 (8)  | 0.0251 (9)  | -0.0016 (8)  | -0.0039 (7)  | 0.0027 (7)   |
| C1  | 0.0266 (12) | 0.0198 (11) | 0.0219 (12) | -0.0026 (11) | 0.0016 (9)   | -0.0005 (10) |
| C2  | 0.0243 (12) | 0.0218 (11) | 0.0237 (12) | -0.0021 (11) | -0.0027 (10) | 0.0029 (10)  |
| C3  | 0.0221 (11) | 0.0190 (11) | 0.0214 (11) | 0.0002 (10)  | 0.0021 (9)   | -0.0049 (9)  |
| C4  | 0.0192 (10) | 0.0157 (10) | 0.0238 (12) | -0.0025 (9)  | 0.0009 (9)   | -0.0002 (9)  |
| C5  | 0.0195 (10) | 0.0176 (11) | 0.0209 (11) | 0.0007 (10)  | -0.0007 (9)  | 0.0007 (9)   |
| C6  | 0.0196 (11) | 0.0207 (11) | 0.0222 (12) | 0.0006 (10)  | -0.0020 (9)  | 0.0001 (10)  |
| C7  | 0.0200 (11) | 0.0211 (11) | 0.0273 (12) | -0.0021 (11) | -0.0042 (9)  | -0.0004 (10) |
| C8  | 0.0214 (11) | 0.0210 (12) | 0.0288 (13) | -0.0008 (10) | -0.0001 (10) | 0.0085 (10)  |
| C9  | 0.0192 (10) | 0.0179 (11) | 0.0285 (13) | 0.0014 (10)  | 0.0035 (9)   | 0.0022 (10)  |
| C10 | 0.0235 (11) | 0.0251 (12) | 0.0189 (11) | -0.0061 (10) | -0.0018 (9)  | 0.0016 (10)  |
| C11 | 0.0199 (11) | 0.0311 (13) | 0.0241 (12) | -0.0043 (11) | -0.0027 (9)  | 0.0025 (11)  |
| C12 | 0.0233 (11) | 0.0263 (12) | 0.0240 (12) | 0.0018 (11)  | 0.0001 (9)   | 0.0012 (10)  |
| C13 | 0.0274 (12) | 0.0221 (12) | 0.0212 (12) | 0.0017 (10)  | -0.0023 (10) | -0.0012 (10) |
| C14 | 0.0253 (11) | 0.0219 (11) | 0.0232 (12) | -0.0008 (10) | -0.0033 (9)  | -0.0031 (10) |
| C15 | 0.0299 (13) | 0.0462 (16) | 0.0240 (13) | -0.0030 (14) | 0.0023 (11)  | 0.0001 (12)  |
| C16 | 0.0232 (11) | 0.0230 (12) | 0.0277 (13) | 0.0026 (10)  | -0.0019 (10) | 0.0024 (10)  |
| C17 | 0.0270 (12) | 0.0252 (13) | 0.0370 (14) | 0.0024 (11)  | 0.0082 (11)  | -0.0006 (11) |
| C18 | 0.0220 (12) | 0.0238 (12) | 0.0213 (12) | -0.0010 (10) | 0.0006 (9)   | 0.0002 (9)   |
| C19 | 0.0238 (12) | 0.0302 (13) | 0.0256 (13) | -0.0079 (11) | 0.0003 (10)  | -0.0009 (11) |
| C20 | 0.0224 (12) | 0.0364 (14) | 0.0302 (13) | 0.0031 (12)  | -0.0011 (10) | 0.0066 (11)  |

**Table 5.** Selected geometric parameters ( $\text{\AA}^2$ ,  $^\circ$ )

|            |             |            |             |
|------------|-------------|------------|-------------|
| O1—C1      | 1.215 (3)   | C11—C12    | 1.506 (3)   |
| O2—C8      | 1.212 (3)   | C11—H11A   | 0.9900      |
| O3—C13     | 1.455 (3)   | C11—H11B   | 0.9900      |
| O3—C12     | 1.464 (3)   | C12—C13    | 1.465 (3)   |
| C1—C2      | 1.452 (3)   | C12—C15    | 1.509 (3)   |
| C1—C9      | 1.550 (3)   | C13—C14    | 1.504 (3)   |
| C2—C3      | 1.343 (3)   | C13—H13    | 0.99 (3)    |
| C2—H2      | 0.9500      | C14—H14A   | 0.9900      |
| C3—C18     | 1.508 (3)   | C14—H14B   | 0.9900      |
| C3—C4      | 1.528 (3)   | C15—H15A   | 0.9800      |
| C4—C9      | 1.557 (3)   | C15—H15B   | 0.9800      |
| C4—C5      | 1.571 (3)   | C15—H15C   | 0.9800      |
| C4—H4      | 1.0000      | C16—H16A   | 0.9800      |
| C5—C10     | 1.534 (3)   | C16—H16B   | 0.9800      |
| C5—C6      | 1.550 (3)   | C16—H16C   | 0.9800      |
| C5—H5      | 1.0000      | C17—H17A   | 0.9800      |
| C6—C16     | 1.538 (3)   | C17—H17B   | 0.9800      |
| C6—C14     | 1.543 (3)   | C17—H17C   | 0.9800      |
| C6—C7      | 1.545 (3)   | C18—C20    | 1.524 (3)   |
| C7—C8      | 1.497 (3)   | C18—C19    | 1.536 (3)   |
| C7—H7A     | 0.9900      | C18—H18    | 1.0000      |
| C7—H7B     | 0.9900      | C19—H19A   | 0.9800      |
| C8—C9      | 1.522 (3)   | C19—H19B   | 0.9800      |
| C9—C17     | 1.541 (3)   | C19—H19C   | 0.9800      |
| C10—C11    | 1.524 (3)   | C20—H20A   | 0.9800      |
| C10—H10A   | 0.9900      | C20—H20B   | 0.9800      |
| C10—H10B   | 0.9900      | C20—H20C   | 0.9800      |
| C13—O3—C12 | 60.24 (15)  | C9—C4—C5   | 119.23 (18) |
| O1—C1—C2   | 127.8 (2)   | C3—C4—H4   | 107.3       |
| O1—C1—C9   | 124.4 (2)   | C9—C4—H4   | 107.3       |
| C2—C1—C9   | 107.59 (19) | C5—C4—H4   | 107.3       |
| C3—C2—C1   | 111.4 (2)   | C10—C5—C6  | 113.82 (18) |
| C3—C2—H2   | 124.3       | C10—C5—C4  | 108.04 (18) |
| C1—C2—H2   | 124.3       | C6—C5—C4   | 112.70 (18) |
| C2—C3—C18  | 124.6 (2)   | C10—C5—H5  | 107.3       |
| C2—C3—C4   | 111.9 (2)   | C6—C5—H5   | 107.3       |
| C18—C3—C4  | 123.5 (2)   | C4—C5—H5   | 107.3       |
| C3—C4—C9   | 103.56 (17) | C16—C6—C14 | 110.04 (18) |
| C3—C4—C5   | 111.48 (17) | C16—C6—C7  | 108.84 (18) |

**Table 5.** Selected geometric parameters ( $\text{\AA}^2$ ,  $^\circ$ )  
(continued)

|               |             |               |             |
|---------------|-------------|---------------|-------------|
| C14—C6—C7     | 105.06 (18) | C12—C13—C14   | 129.2 (2)   |
| C16—C6—C5     | 112.34 (19) | O3—C13—H13    | 111.2 (16)  |
| C14—C6—C5     | 112.97 (18) | C12—C13—H13   | 115.5 (15)  |
| C7—C6—C5      | 107.22 (18) | C14—C13—H13   | 110.0 (16)  |
| C8—C7—C6      | 110.62 (19) | C13—C14—C6    | 123.10 (19) |
| C8—C7—H7A     | 109.5       | C13—C14—H14A  | 106.6       |
| C6—C7—H7A     | 109.5       | C6—C14—H14A   | 106.6       |
| C8—C7—H7B     | 109.5       | C13—C14—H14B  | 106.6       |
| C6—C7—H7B     | 109.5       | C6—C14—H14B   | 106.6       |
| H7A—C7—H7B    | 108.1       | H14A—C14—H14B | 106.5       |
| O2—C8—C7      | 123.0 (2)   | C12—C15—H15A  | 109.5       |
| O2—C8—C9      | 121.2 (2)   | C12—C15—H15B  | 109.5       |
| C7—C8—C9      | 115.83 (19) | H15A—C15—H15B | 109.5       |
| C8—C9—C17     | 110.28 (19) | C12—C15—H15C  | 109.5       |
| C8—C9—C1      | 107.28 (19) | H15A—C15—H15C | 109.5       |
| C17—C9—C1     | 106.78 (19) | H15B—C15—H15C | 109.5       |
| C8—C9—C4      | 116.96 (19) | C6—C16—H16A   | 109.5       |
| C17—C9—C4     | 110.96 (19) | C6—C16—H16B   | 109.5       |
| C1—C9—C4      | 103.83 (17) | H16A—C16—H16B | 109.5       |
| C11—C10—C5    | 116.4 (2)   | C6—C16—H16C   | 109.5       |
| C11—C10—H10A  | 108.2       | H16A—C16—H16C | 109.5       |
| C5—C10—H10A   | 108.2       | H16B—C16—H16C | 109.5       |
| C11—C10—H10B  | 108.2       | C9—C17—H17A   | 109.5       |
| C5—C10—H10B   | 108.2       | C9—C17—H17B   | 109.5       |
| H10A—C10—H10B | 107.3       | H17A—C17—H17B | 109.5       |
| C12—C11—C10   | 117.96 (19) | C9—C17—H17C   | 109.5       |
| C12—C11—H11A  | 107.8       | H17A—C17—H17C | 109.5       |
| C10—C11—H11A  | 107.8       | H17B—C17—H17C | 109.5       |
| C12—C11—H11B  | 107.8       | C3—C18—C20    | 112.3 (2)   |
| C10—C11—H11B  | 107.8       | C3—C18—C19    | 110.0 (2)   |
| H11A—C11—H11B | 107.2       | C20—C18—C19   | 110.1 (2)   |
| O3—C12—C13    | 59.57 (14)  | C3—C18—H18    | 108.1       |
| O3—C12—C11    | 115.7 (2)   | C20—C18—H18   | 108.1       |
| C13—C12—C11   | 123.4 (2)   | C19—C18—H18   | 108.1       |
| O3—C12—C15    | 114.4 (2)   | C18—C19—H19A  | 109.5       |
| C13—C12—C15   | 118.2 (2)   | C18—C19—H19B  | 109.5       |
| C11—C12—C15   | 113.8 (2)   | H19A—C19—H19B | 109.5       |
| O3—C13—C12    | 60.19 (15)  | C18—C19—H19C  | 109.5       |
| O3—C13—C14    | 121.3 (2)   | H19A—C19—H19C | 109.5       |

**Table 5.** Selected geometric parameters ( $\text{\AA}^2$ ,  $^\circ$ )  
(continued)

|               |              |                 |              |
|---------------|--------------|-----------------|--------------|
| H19B—C19—H19C | 109.5        | C18—C20—H20C    | 109.5        |
| C18—C20—H20A  | 109.5        | H20A—C20—H20C   | 109.5        |
| C18—C20—H20B  | 109.5        | H20B—C20—H20C   | 109.5        |
| H20A—C20—H20B | 109.5        |                 |              |
| O1—C1—C2—C3   | -179.6 (2)   | C2—C1—C9—C17    | 106.1 (2)    |
| C9—C1—C2—C3   | 5.0 (3)      | O1—C1—C9—C4     | 173.2 (2)    |
| C1—C2—C3—C18  | -174.6 (2)   | C2—C1—C9—C4     | -11.2 (2)    |
| C1—C2—C3—C4   | 3.8 (3)      | C3—C4—C9—C8     | 130.6 (2)    |
| C2—C3—C4—C9   | -10.8 (3)    | C5—C4—C9—C8     | 6.1 (3)      |
| C18—C3—C4—C9  | 167.7 (2)    | C3—C4—C9—C17    | -101.7 (2)   |
| C2—C3—C4—C5   | 118.6 (2)    | C5—C4—C9—C17    | 133.8 (2)    |
| C18—C3—C4—C5  | -62.9 (3)    | C3—C4—C9—C1     | 12.7 (2)     |
| C3—C4—C5—C10  | 89.3 (2)     | C5—C4—C9—C1     | -111.8 (2)   |
| C9—C4—C5—C10  | -150.08 (19) | C6—C5—C10—C11   | 80.2 (2)     |
| C3—C4—C5—C6   | -144.05 (19) | C4—C5—C10—C11   | -153.81 (19) |
| C9—C4—C5—C6   | -23.5 (3)    | C5—C10—C11—C12  | -72.3 (3)    |
| C10—C5—C6—C16 | 57.0 (3)     | C13—O3—C12—C11  | 115.2 (2)    |
| C4—C5—C6—C16  | -66.4 (2)    | C13—O3—C12—C15  | -109.5 (2)   |
| C10—C5—C6—C14 | -68.2 (2)    | C10—C11—C12—O3  | -30.0 (3)    |
| C4—C5—C6—C14  | 168.35 (18)  | C10—C11—C12—C13 | 39.2 (4)     |
| C10—C5—C6—C7  | 176.55 (18)  | C10—C11—C12—C15 | -165.5 (2)   |
| C4—C5—C6—C7   | 53.1 (2)     | C12—O3—C13—C14  | -120.3 (3)   |
| C16—C6—C7—C8  | 52.3 (2)     | C11—C12—C13—O3  | -102.4 (3)   |
| C14—C6—C7—C8  | 170.08 (18)  | C15—C12—C13—O3  | 103.3 (2)    |
| C5—C6—C7—C8   | -69.5 (2)    | O3—C12—C13—C14  | 107.8 (3)    |
| C6—C7—C8—O2   | -127.9 (2)   | C11—C12—C13—C14 | 5.4 (4)      |
| C6—C7—C8—C9   | 53.3 (3)     | C15—C12—C13—C14 | -149.0 (2)   |
| O2—C8—C9—C17  | 32.3 (3)     | O3—C13—C14—C6   | 31.5 (3)     |
| C7—C8—C9—C17  | -148.8 (2)   | C12—C13—C14—C6  | -43.7 (3)    |
| O2—C8—C9—C1   | -83.7 (3)    | C16—C6—C14—C13  | -67.4 (3)    |
| C7—C8—C9—C1   | 95.2 (2)     | C7—C6—C14—C13   | 175.6 (2)    |
| O2—C8—C9—C4   | 160.3 (2)    | C5—C6—C14—C13   | 59.1 (3)     |
| C7—C8—C9—C4   | -20.8 (3)    | C2—C3—C18—C20   | -10.1 (3)    |
| O1—C1—C9—C8   | 48.7 (3)     | C4—C3—C18—C20   | 171.65 (19)  |
| C2—C1—C9—C8   | -135.65 (19) | C2—C3—C18—C19   | 113.0 (3)    |
| O1—C1—C9—C17  | -69.5 (3)    | C4—C3—C18—C19   | -65.3 (3)    |
